# Supplementary material for: Collagen-derived dipeptide Pro-Hyp administration accelerates muscle regenerative healing accompanied by less scarring after wounding on the abdominal wall in mice
Source: PubMed Central journal article supplement (PMC8455591; doi:10.1038/s41598-021-98407-9), 2021-09-21
Supplement: 41598_2021_98407_MOESM1_ESM.pdf [file 41598_2021_98407_MOESM1_ESM.pdf]

**Fig. S1. Drinking amounts per mouse with different peptide drinks.**

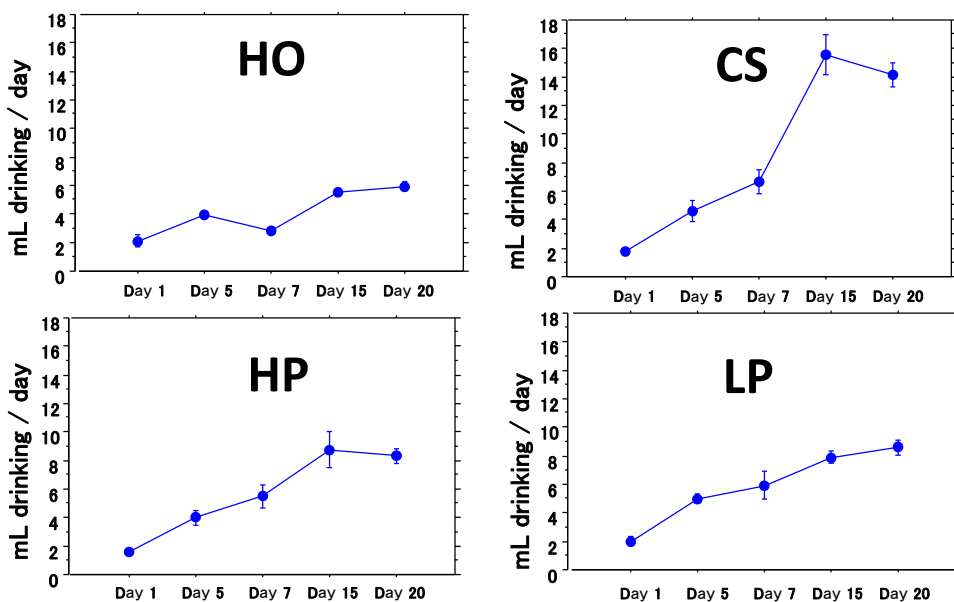

**Table S1. Bodyweight and blood profiles in abdominal wound model mice with different peptide drinks.**

|                              |    | Day 0       | Day 8       | Day 15      | Day 21      |
|------------------------------|----|-------------|-------------|-------------|-------------|
| Bodyweight<br>g              | HO | 18.6 ± 1.0  | 18.2 ± 1.3  | 20.5 ± 1.3  | 21.2 ± 1.2  |
|                              | CS | 18.8 ± 0.7  | 17.6 ± 0.9  | 19.7 ± 0.7  | 20.9 ± 0.5  |
|                              | HP | 18.5 ± 0.7  | 18.2 ± 0.6  | 20.3 ± 0.6  | 21.1 ± 0.8  |
|                              | LP | 18.9 ± 0.7  | 18.1 ± 0.9  | 20.1 ± 0.9  | 20.8 ± 0.5  |
| WBC<br>× 10 <sup>2</sup> /μL | HO | 41.2 ± 9.2  | 56.3 ± 11.7 | 29 ± 18     | 49 ± 13.1   |
|                              | CS | 36.6 ± 10.3 | 48 ± 19.5   | 37.2 ± 1.8  | 40 ± 13.1   |
|                              | HP | 44.7 ± 10.5 | 55.5 ± 10.5 | 34 ± 7.7    | 51 ± 14.2   |
|                              | LP | 39.5 ± 15.5 | 48.2 ± 14.3 | 29 ± 18     | 46.5 ± 14.9 |
| RBC<br>× 10 <sup>4</sup> /μL | HO | 1118 ± 36   | 900 ± 74    | 971 ± 54    | 1091 ± 94   |
|                              | CS | 1160 ± 50   | 886 ± 64    | 1043 ± 69   | 1067 ± 103  |
|                              | HP | 1141 ± 21   | 923 ± 93    | 1010 ± 37   | 1070 ± 80   |
|                              | LP | 1148 ± 37   | 929 ± 46    | 1015 ± 25   | 1003 ± 42   |
| PLT<br>× 10 <sup>4</sup> /μL | HO | 73.3 ± 9.6  | 51.4 ± 10.2 | 98.6 ± 18.3 | 88.2 ± 8.4  |
|                              | CS | 81 ± 7.8    | 53.3 ± 17.5 | 86 ± 25.7   | 75.6 ± 18.2 |
|                              | HP | 74.8 ± 10.8 | 66.3 ± 22.9 | 90 ± 16.3   | 78.2 ± 14   |
|                              | LP | 76.4 ± 6.7  | 61.6 ± 13.4 | 80.8 ± 19.3 | 79 ± 15.1   |

(Mean ± SD)

**Fig. S2. Plasma Pro-Hyp concentrations after a single i.p. injection of Pro-Hyp.**

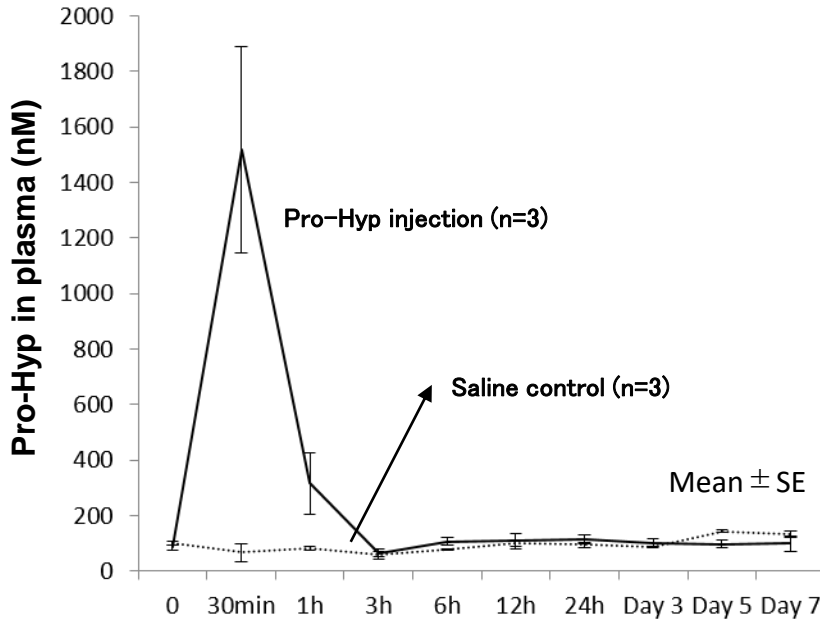

**Table S2. Bodyweight and blood profiles in abdominal wound model mice with daily i.p. injection of Pro-Hyp.**

|                                     |             | Day 0      | Day 7      | Day 14     | Day 21     |
|-------------------------------------|-------------|------------|------------|------------|------------|
| <b>Bodyweight</b><br>g              | Control (C) | 19.5 ± 0.7 | 17.9 ± 1.0 | 17.7 ± 2.3 | 21.1 ± 1.2 |
|                                     | Pro-Hyp (P) | 19.5 ± 0.8 | 17.5 ± 0.4 | 17.8 ± 1.0 | 21.0 ± 0.8 |
| <b>WBC</b><br>× 10 <sup>2</sup> /μL | Control (C) | 74 ± 22    | 53 ± 7     | 63 ± 12    | 82 ± 14    |
|                                     | Pro-Hyp (P) | 48 ± 7     | 40 ± 13    | 48 ± 6     | 74 ± 12    |
| <b>RBC</b><br>× 10 <sup>4</sup> /μL | Control (C) | 950 ± 76   | 1016 ± 34  | 1006 ± 34  | 926 ± 74   |
|                                     | Pro-Hyp (P) | 984 ± 50   | 941 ± 93   | 939 ± 55   | 873 ± 44   |
| <b>PLT</b><br>× 10 <sup>4</sup> /μL | Control (C) | 65 ± 11    | 76 ± 8     | 70 ± 13    | 50 ± 22    |
|                                     | Pro-Hyp (P) | 50 ± 21    | 90 ± 8     | 82 ± 6     | 65 ± 9     |

(Mean ± SD)
